# Supplementary material for: Photooxidation of 1,5-dihydroxynaphthalene with iridium complexes as singlet oxygen sensitizers
Source: Royal Society of Chemistry journal article supplement (doi:10.1039/c0pp00265h), 2011-02-07
Supplement: c0pp00265h.pdf [file c0pp00265h.pdf]

## Supporting Information

### Photooxidation of 1,5-dihydroxynaphthalene with iridium complexes as singlet oxygen sensitizers

Shin-ya Takizawa, Ryo Aboshi, and Shigeru Murata\*

Department of Basic Science, Graduate School of Arts and Sciences, The University of Tokyo,  
Meguro-ku, Tokyo 153-8902, Japan  
cmura@mail.ecc.u-tokyo.ac.jp

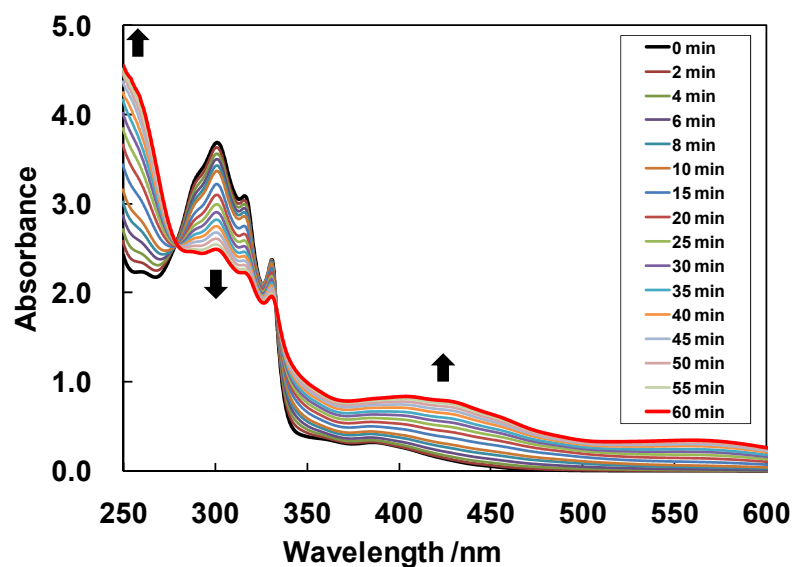

Fig. S1. Spectral change for the photooxidation of DHN using complex 2 as a sensitizer.

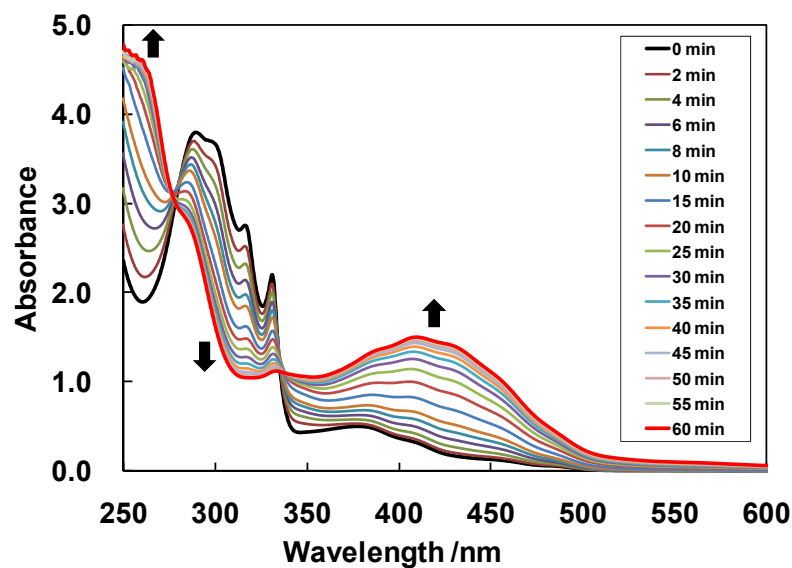

Fig. S2. Spectral change for the photooxidation of DHN using complex 3 as a sensitizer.

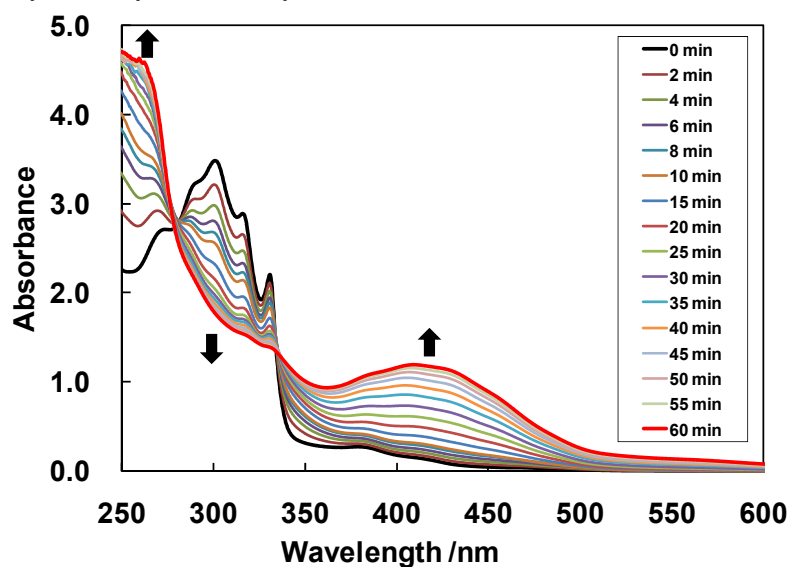

Fig. S3. Spectral change for the photooxidation of DHN using complex 4 as a sensitizer.

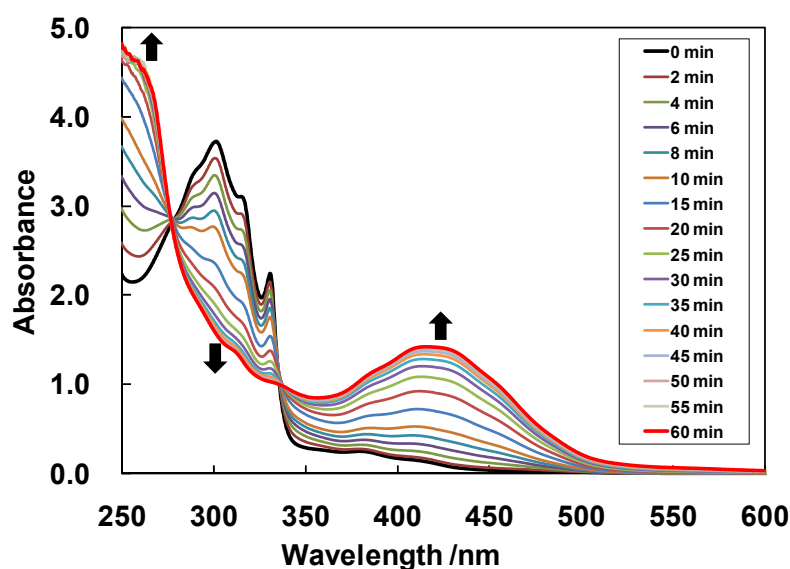

Fig. S4. Spectral change for the photooxidation of DHN using complex 5 as a sensitizer.

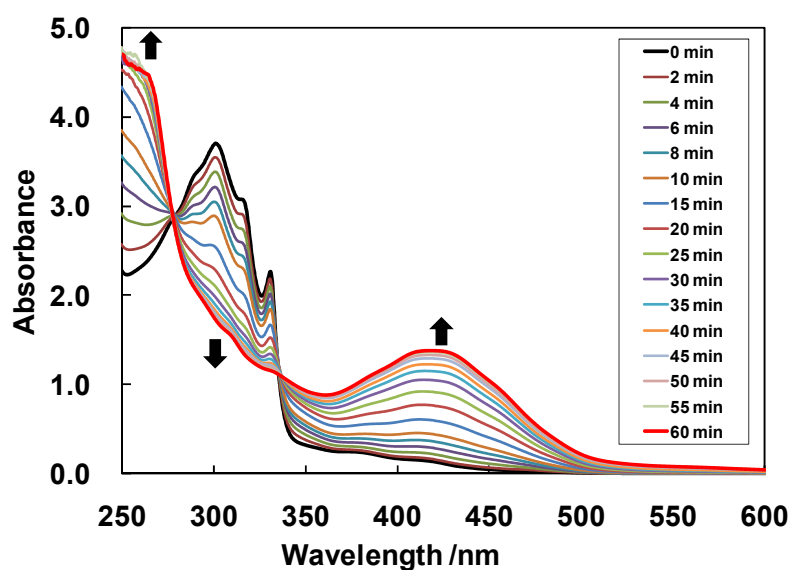

Fig. S5. Spectral change for the photooxidation of DHN using complex 6 as a sensitizer.

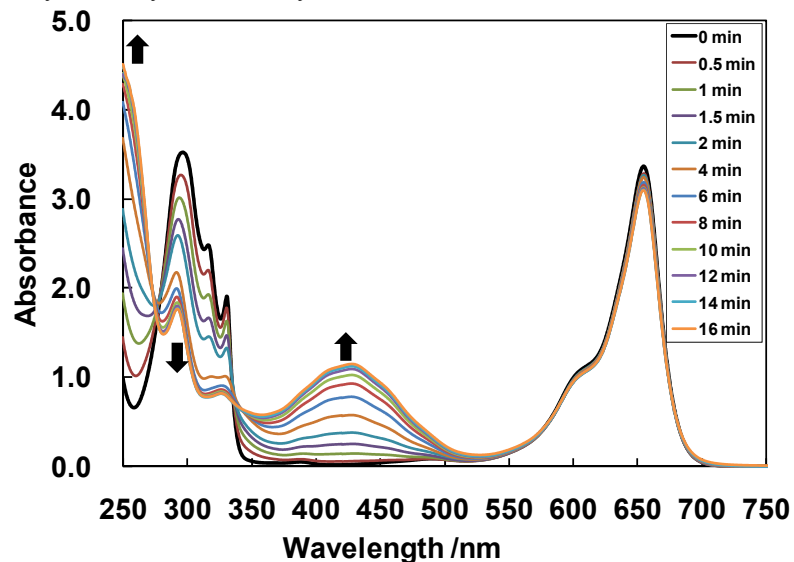

Fig. S6. Spectral change for the photooxidation of DHN using methylene blue (MB) as a sensitizer.

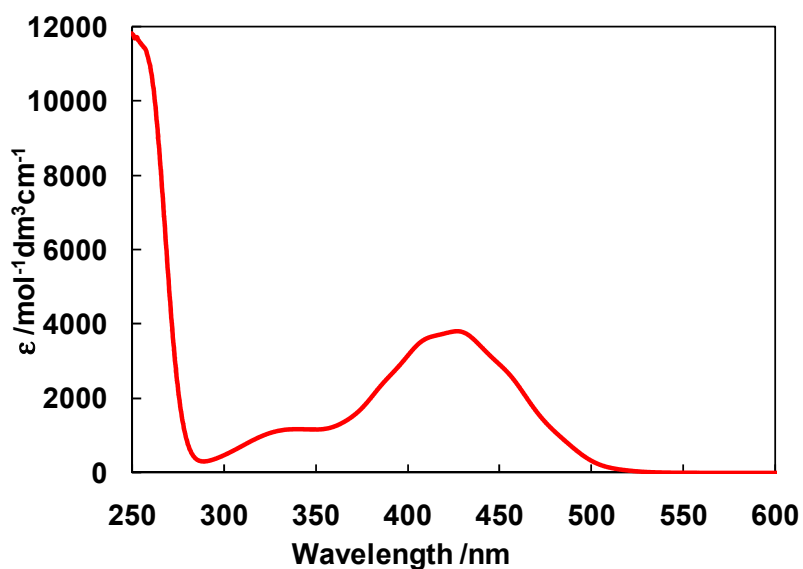

Fig. S7. UV-Vis absorption spectrum of Juglone in CH<sub>2</sub>Cl<sub>2</sub>-MeOH (9:1).

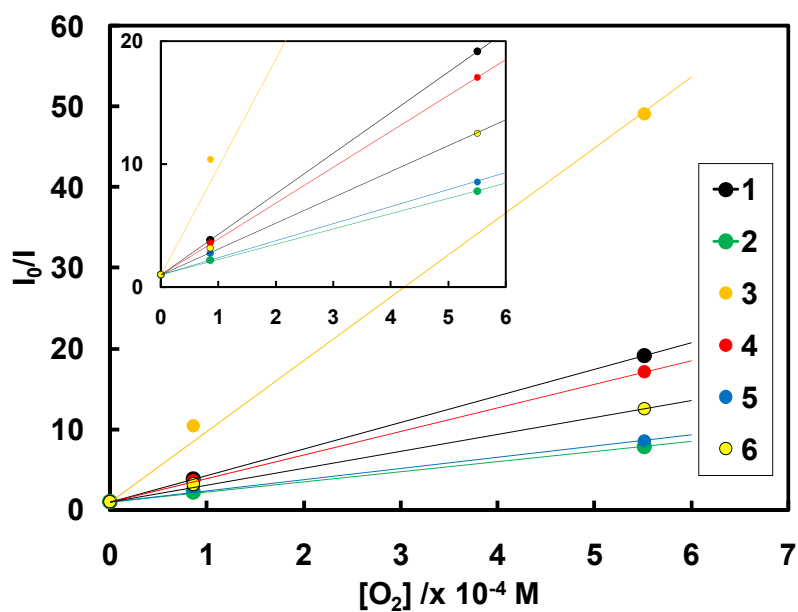

Fig. S8. Stern-Volmer plot for the quenching of sensitizer phosphorescence by oxygen.

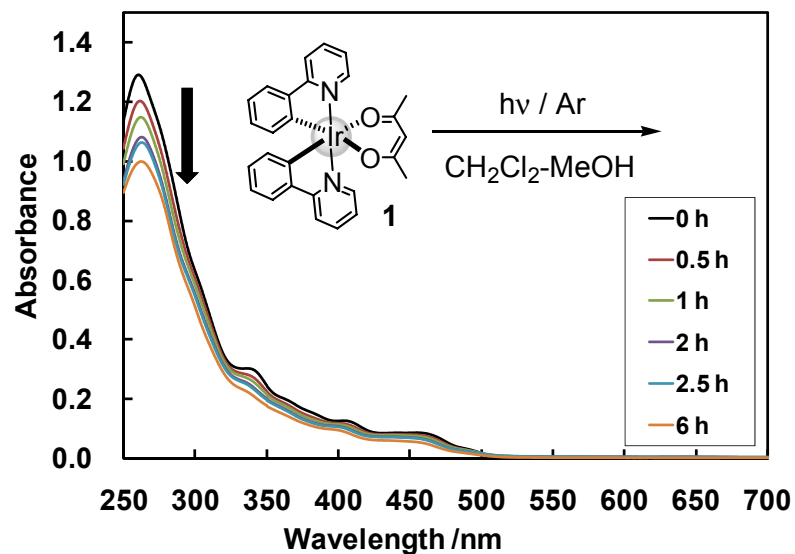

Fig. S9. Absorption spectral change of complex 1 upon irradiation ( $\lambda > 350$  nm) under Ar.

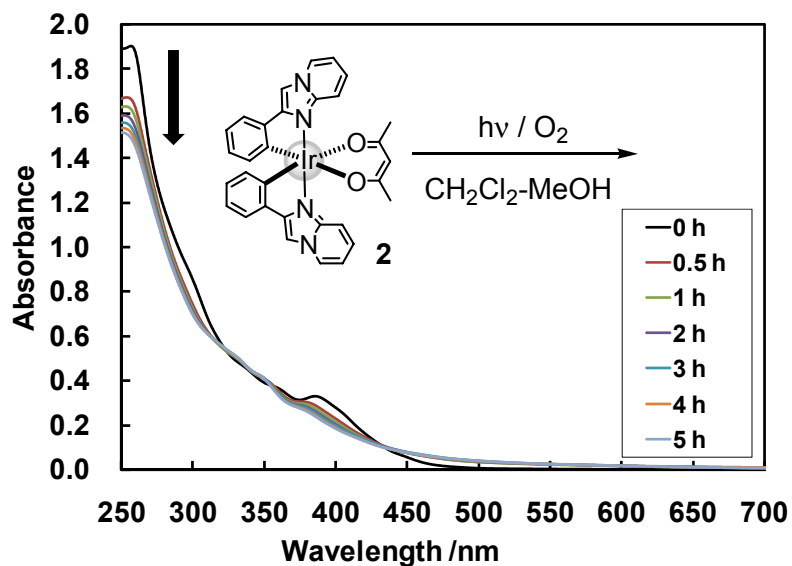

Fig. S10. Absorption spectral change of complex 2 upon irradiation ( $\lambda > 350$  nm) under O<sub>2</sub>.

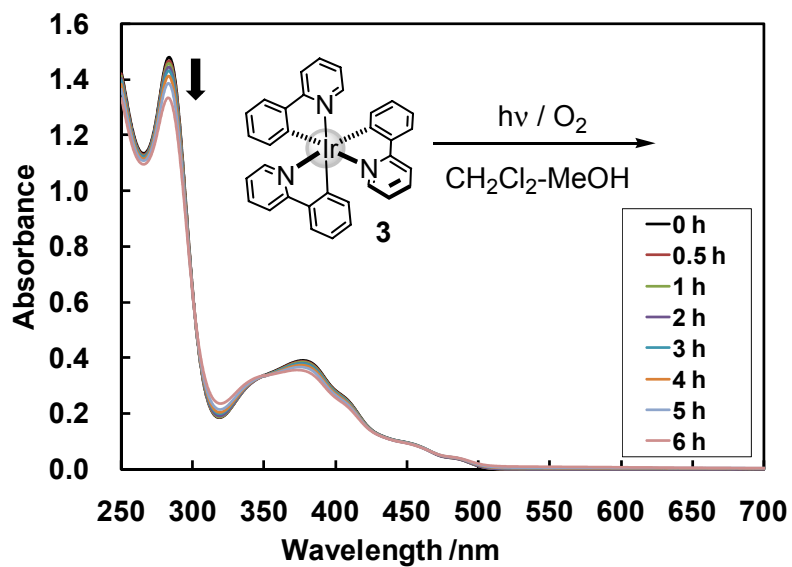

**Fig. S11.** Absorption spectral change of complex **3** upon irradiation ( $\lambda > 350$  nm) under  $O_2$ .

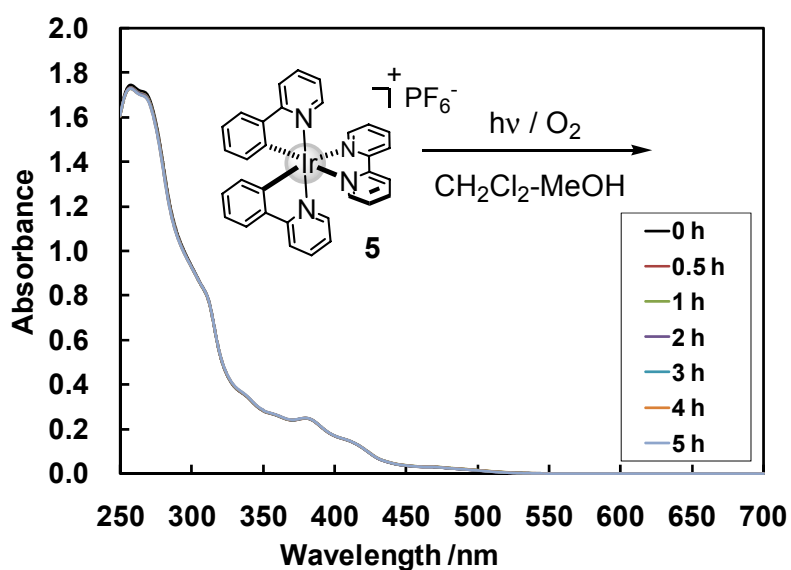

**Fig. S12.** Absorption spectral change of complex **5** upon irradiation ( $\lambda > 350$  nm) under  $O_2$ .

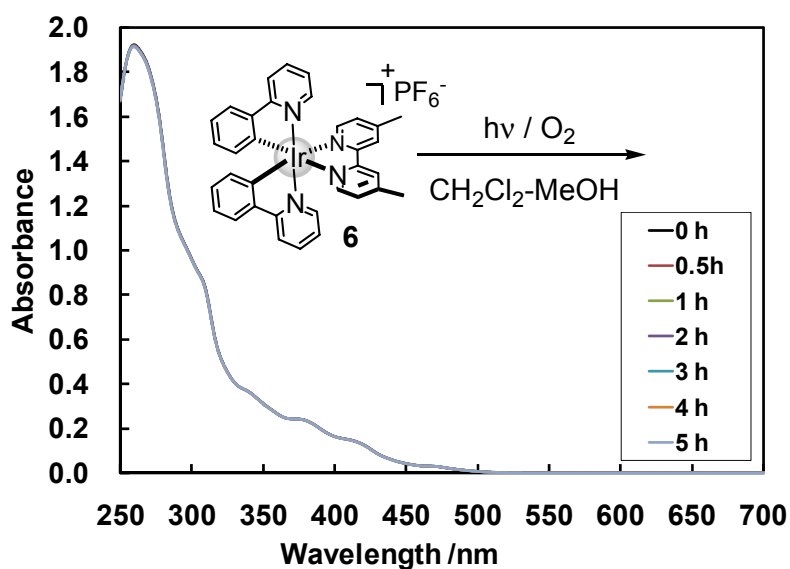

**Fig. S13.** Absorption spectral change of complex **6** upon irradiation ( $\lambda > 350$  nm) under  $O_2$ .
